# Supplementary material for: Early postmortem mapping of SARS-CoV-2 RNA in patients with COVID-19 and the correlation with tissue damage
Source: eLife. 2021 Mar 30;10:e60361. doi: 10.7554/eLife.60361 (PMC8009677; doi:10.7554/eLife.60361)
Supplement: Figure 1—source data 1. — RNA with qRT-PCR of homogenized organs and tissues with r-Biopharm qRT-PCR, raw data shows the crossing points (cycle threshold, Ct). [file elife-60361-fig1-data1.xlsx]

## Sheet: Sheet1
		Ct-values
		patient 1	patient 2	patient 3	patient 4	patient 5	patient 6	patient 7	patient 8	patient 9	patient 10	patient 11	patient 12
1	Right lung UL	16.83	0	19.92	19.39	11.79	21.95	0	18,53	29,35	0	29,04	27,25
2	Right lung ML	14.58	33.8	16.14	19.44	11.84	20.39	0	21,29	28,79	0	30,84	27,46
3	Right lung LL	16.95	24.23	22.37	19.51	11.53	23.42	34,08	18,90	26,73	0	32,15	25,52
4	left lung UL	16.41	0	15.08	15.26	13.2	20.39	0	17,54	24,07	0	25,94	27
5	Left lung LL	16.72	27.94	16.73	18.71	14.02	22.87	0	19,79	23,72	0	29,58	27,69
6	Epiglottis	29.63	32.72	31.2	24.86	28.12	30.99	32.04	20.84	28.54	0	0	28.03
7	Trachea middle	29.75	32.08	26.54	17.14	18.8	28.06	35.22	18.42	30.34	31.65	0	0
8	Trachea bifurcation	27.84	32.91	25.66	18.76	20.4	25.57	35.24	20.82	31.35	33.37	0	0
9	Aortic arch	29.93	0	26.62	23.53	25.03	34.55	0	25.16	33.28	0	0	0
10	abdominal aorta	33.2	0	0	29.83	26.67	35.16	0	24.48	0	35.47	0	0
11	Heart VW basal	29.66	0	33.93	33.87	30.08	35.06	0	29.64	0	0	0	0
12	Liver	0	0	30.39	31.94	29.11	35.47	0	0	32.45	0	0	0
13	Stomach(Corpus)	32.86	0	34.1	0	32.06	0	0	18.26	0	0	0	0
14	urinary bladder	34.97	0	32.4	32.74	30.39	0	0	23.92	0	35.19	0	0
15	cerebellum	0	0	0	28.8	30.03	0	0	0	0	0	0	0
16	Bone marrow	35.11	0	34.34	28.79	27.41	32.9	0	23.77	0	0	0	0
17	Brain Hippocampus	0	0	31.23	31.7	31.97	0	0	0	0	0	0	0
18	gall bladder	0	0	29.57	0	0	0	0	34.85	0	34.4	0	0
19	Prostate	0	0	24.97	29.51	31.43	0	0	28.45	35.33	35.82	0	0
20	lymph nodes paraaortal	34.24	0	23.82	30.62	27.55	28.14	0	24.25	0	0	0	0
21	Jejunum	35.23	0	29.19	28.22	32.5	0	0	20.94	0	0	0	0
22	Brain frontal lobe	0	0	29.54	34.55	30.83	0	0	0	0	0	0	0
23	Pons	0	0	23.35	28.82	31.38	0	0	0	0	0	0	0
24	Testicle	32.88	0	32.4	28.02	28.88	0	0	0	0	0	0	0
25	Duodenum	30.9	0	32.45	31.22	0	33.72	0	19.05	0	0	0	0
26	Spleen	32.46	0	34.78	32.58	28.04	0	0	30.14	0	0	0	0
27	Heart HW basal	32.3	0	33.98	34.59	32.55	35.05	35.21	34.94	0	0	0	0
28	Appendix	34.73	0	26.86	28.18	30.95	0	0	0	0	0	0	0
29	lymph nodes hilär	22.71	29.63	25.02	24.37	20	27.13	0	21.25	30.97	0	27.01	31.61
30	left kidney	0	0	31.46	32.23	22.22	0	0	26.6	34.14	0	0	0
31	Heart Septum basal	34.97	0	31.81	0	31.96	35.11	0	34.06	0	0	0	0
32	Heart HW apikal	32.75	0	33.39	33.82	28.18	34.15	0	33.63	0	0	0	0
33	Heart VW apikal	31.02	0	35.29	0	30.26	35.26	21.61	32.63	34.98	0	0	0
34	Heart Septum apikal	35.16	0	33.13	0	29.81	33.21	0	31.79	35.11	0	0	0
35	Heart rechte Kammer	35.07	0	33.18	33.66	29.67	33.56	0	0	0	0	0	0
36	Ileum	0	0	20.75	31.28	31.04	0	0	19.68	32.99	0	33.3	0
37	Right kidney	0	0	34.79	31.99	29.02	35.02	0	29.39	0	0	0	0
38	adrenal gland	0	0	0	28.43	29.5	35.91	0	28.01	36.03	0	0	0
39	Pancreas	0	0	0	0	0	0	0	30.84	0	35.13	0	0
40	Thyroid gland	0	0	27.42	27.59	24.99	30.06	34.05	22.18	31.76	0	0	0
41	Colon	0	0	20.49	33.57	32.27	0	0	20.85	0	0	0	0
42	Rectum	0	0	29.03	0	30.34	35.02	0	28.88	33.97	0	0	0
43	lymph nodes cervical	33.72	27.72	28.08	24.64	19.58	28.22	35.22	23.42	32.88	0	29.7	31.15
44	blood	0	0	0	0	23.94	0	0	0	0	0	0	0
